# Supplementary material
Source: PubMed Central journal article supplement (PMC3583996)
Supplement: 8427e6ebd0c8abe7aff774f80965a09b_genetics.112.146910-4.pdf [file 8427e6ebd0c8abe7aff774f80965a09b_genetics.112.146910-4.pdf]

**Table S1 Oligonucleotides used for site-directed mutagenesis**

| Allele             | PCR Primer Name | PCR Primer Sequence                            |
|--------------------|-----------------|------------------------------------------------|
| <i>pol2-4</i>      | pol2-4F1        | 5'-CTGTGGTAATGGCATTGCTATAGCTACCACGAAGCCGCC-3'  |
|                    | pol2-4R1        | 5'-GGCGGCTTCGTGGTAGCTATAGCAAATGCCATTACCACAG-3' |
| <i>pol2-G435C</i>  | eex51qcF        | 5'-ATTCTTATTTACCACAATGTTCCAGGGTTTAAAA-3'       |
|                    | eex51qcR        | 5'-TTTTAAACCCTGGGAACATTGTGGTAAATAAGAAT-3'      |
| <i>pol2-V522A</i>  | eex20qcR        | 5'-GAAATGTTGTTGATGGCTCAAGCTTATCAACAT-3'        |
|                    | eex20qcR        | 5'-ATGTTGATAAGCTTGAGCCATCAACAACATTC-3'         |
| <i>pol2-T850M</i>  | eex26qcF        | 5'-GAAATGGCGGGGATTATGTGTTAACAGGTGCC-3'         |
|                    | eex26qcR        | 5'-GGCACCTGTAAACACATAATCCCCGCCATTC-3'          |
| <i>pol2-K966Q</i>  | eex55qcF        | 5'-GAAGGAAAAGGTATACAGAAAAGATATGCTGTC-3'        |
|                    | eex55qcR        | 5'-GACAGCATATCTTTTCTGTATACCTTTTCCTTC-3'        |
| <i>pol2-A1153D</i> | eex12qcF        | 5'-GAAAGACTTGGATCTGATATACAAAAGATAATT-3'        |
|                    | eex12qcR        | 5'-AATTATCTTTTGTATATCAGATCCAAGTCTTC-3'         |

Mutations were introduced into pRS415POL2 or pRS415pol2-4 using the QuickChange protocol (Wang and Malcolm 1999), Phusion Polymerase (New England Biolabs), the indicated primers, and PCR conditions of 95°C, 1 min; 16x (95°C, 40 sec.; 53°C, 60 sec., 68°C, 7 min.).
