# Supplementary material
Source: PubMed Central journal article supplement (PMC3583996)
Supplement: 9178d78c0da66609c5a33bf0bc01cb0c_genetics.112.146910-3.pdf [file 9178d78c0da66609c5a33bf0bc01cb0c_genetics.112.146910-3.pdf]

## REFERENCES

- Brachmann, C. B., A. Davies, G. J. Cost, E. Caputo, J. Li *et al.*, 1998 Designer deletion strains derived from *Saccharomyces cerevisiae* S288C: a useful set of strains and plasmids for PCR-mediated gene disruption and other applications. *Yeast* 14: 115-132.
- Guldener, U., S. Heck, T. Fielder, J. Beinhauer and J. H. Hegemann, 1996 A new efficient gene disruption cassette for repeated use in budding yeast. *Nucleic Acids Res.* 24: 2519-2524.
- Herr, A. J., M. Ogawa, N. A. Lawrence, L. N. Williams, J. M. Eggington *et al.*, 2011 Mutator suppression and escape from replication error–induced extinction in yeast. *PLoS Genet.* 7: e1002282.
- Stulemeijer, I. J., B. L. Pike, A. W. Faber, K. F. Verzijlbergen, T. van Welsem *et al.*, 2011 Dot1 binding induces chromatin rearrangements by histone methylation-dependent and -independent mechanisms. *Epigenetics Chromatin.* 4: 2-15.
- Tong, A. H. Y., and C. Boone, 2007 High-throughput strain construction and systematic synthetic lethal screening in *Saccaromyces cerevisiae*, pp. 369-386, 706-707 in *Methods in Microbiology*, edited by I. Stansfield and M. J. R. Stark. Academic Press.
- Wang, W., and B. A. Malcolm, 1999 Two-stage PCR protocol allowing introduction of multiple mutations, deletions and insertions using QuikChange Site-Directed Mutagenesis. *Biotechniques* 26: 680-682.
