# Supplementary material
Source: PubMed Central journal article supplement (PMC3583996)
Supplement: 973875f2e7d3e31b93d95ccad1741c44_genetics.112.146910-5.pdf [file 973875f2e7d3e31b93d95ccad1741c44_genetics.112.146910-5.pdf]

**Table S3 Construction of chromosomal gene disruptions**

| Allele                                    | PCR Primer Name | PCR Primer Sequence                                                                                  | PCR Template <sup>a</sup>                       |
|-------------------------------------------|-----------------|------------------------------------------------------------------------------------------------------|-------------------------------------------------|
| <i>pol2Δ::kanMX</i>                       | Pol2-kanMXkoF   | 5'-ATGATGTTTGGCAAGAAAAAACAACGGAGGATCTTCCACTGCAAGATATTCAGCTGGCGAAGTTATTAGGTCTAGAGATCTG-3'             | pUG6 (Guldener <i>et al.</i> 1996)              |
|                                           | Pol2-kanMXkoR   | 5'-TCATATGGTCAAATCAGCAATACAACCTCAATAATATATCAAACCGTAATACTTGGCTACTACGAAGTTATATTAAGGGTTCTCG-3'          |                                                 |
| <i>pol2Δ::natMX</i>                       | Pol2::nat1-for2 | 5'-AGAGCATATGATGATGAAAGAGCACATTCTATCAAGATAAACACTCTCAGGGGACAAGTATACATGGAGGCCAGAATACCCT-3'             | pFvL99 (Stulemeijer <i>et al.</i> 2011)         |
|                                           | Pol2::nat1-rev2 | 5'-TTTTTTTTTTTTTTTTTTCATGGTAAAGAGGCCATTGAACCTCGCGTTATATAC TGCTTACCAGTATAGCGACCAGCATTAC-3'            |                                                 |
| <i>pol3Δ::natMX</i>                       | Pol3MXF         | 5'-ATAGATATTGAGCACTTGCTATTAAGCATTAACTTTATACATATACGCACAGCAACATGGAGGCCAGAATACCCT-3'                    | pFvL99 (Stulemeijer <i>et al.</i> 2011)         |
|                                           | Pol3MXR         | 5'-GCAAAAAGTTGTTAGCCTTTCTTAATCCTAATATGATGTGCCACCCTATCGTTTTCAGTATAGCGACCAGCATTAC-3'                   |                                                 |
| <i>msh2Δ::HIS3</i> or <i>msh2Δ::TRP1</i>  | Msh2U           | 5'-AAAAATCTCTTTATCTGCTGACCTAACATCAAATCCTCAGATTA AAAAGTAGA TTGTACTGAGAGTGCAC-3'                       | pRS413 or pRS414 (Brachmann <i>et al.</i> 1998) |
|                                           | Msh2D           | 5'-TTATAACAACAAGGCTTTTATATATTTTCAGGTAATTATCGTTTTCTTTCTGTGCGGTATTTACACCG-3'                           |                                                 |
| <i>msh2Δ::MET15</i>                       | Msh2::Met15F    | 5'-AAAAATCTCTTTATCTGCTGACCTAACATCAAATCCTGCTGGCTTAACTATGCGGCATC-3'                                    | pRS411 (Brachmann <i>et al.</i> 1998)           |
|                                           | Msh2::Met15R    | 5'-TTATAACAACAAGGCTTTTATATATTTTCAGGTAATTATGTTTACAATTTCTGTATGCGGT-3'                                  |                                                 |
| <i>msh6Δ::HIS3</i> or <i>msh6Δ::TRP1</i>  | Msh6U           | 5'-TTAATTGGAGCAACTAGTTAATTTTGACAAAGCCAATTTGAACTCCAAGAAGTTATTAGGTCTAGAGATCTG-3'                       | pRS413 or pRS414 (Brachmann <i>et al.</i> 1998) |
|                                           | Msh6D           | 5'-ACTTTAAAAAAAATAAGTAAAAATCTTACATACATCGTAAATGAAAATACACGAAGTTATATTAAGGGTTCTCG-3'                     |                                                 |
| <i>mlh1 Δ::HIS3</i> or <i>mlh1Δ::TRP1</i> | Mlh1U           | 5'-ATAGTGATAGTAAATGGAAGGTAAAAATAACATAGACCTATCAATAAGCAA TGCTCTCAGAATAAAAGCAGATTGTAAGTACTGAGAGTGCAC-3' | pRS413 or pRS414 (Brachmann <i>et al.</i> 1998) |
|                                           | Mlh1D           | 5'-CTCAGGAAATAAACAAAAAATTTGGTATTACAGCCAAAACGTTTTAAAGTT AACACCTCTCAAAAATTTACTGTGCGGT ATTTACACCG-3'    |                                                 |
| <i>pms1Δ::HIS3</i> or <i>pms1Δ::TRP1</i>  | Pms1U           | 5'-GAACGCGAAAAGAAAAGACGCTCTCTTAATAATCATTATGCGATAAAATGTTTCACCACATCGAAAAAGATTGTAAGTACTGAGAGTGCAC-3'    | pRS413 or pRS414 (Brachmann <i>et al.</i> 1998) |
|                                           | Pms1D           | 5'-TGTATATAATGATTTGTTAATTATATAATGAATGAATATCAAAGCTAGATCA TATTCGTAATCCTTCGACTGTGCGGTATTTACACCG-3'      |                                                 |

|                                                |                       |                                                                                             |                                                          |
|------------------------------------------------|-----------------------|---------------------------------------------------------------------------------------------|----------------------------------------------------------|
| <i>mlh3::MET15</i><br>or<br><i>mlh3Δ::TRP1</i> | Mlh3KO-<br>upstream   | 5'-ACATAAACCCAGCGAGGCTTTCAAGGAAGAATGAACGTGAACTCGTCAACTC<br>AAAAAGAAAAGATTGTACTGAGAGTGCAC-3' | pRS411 or<br>pRS414<br>(Brachmann<br><i>et al.</i> 1998) |
|                                                | Mlh3KO-<br>downstream | 5'-TGCATATCCGCGCAATTTAAAATGCAGGCGACAAACCTTGTTCCAGGATTA<br>GGTTCTCTGTGCGGTATTTACACCG-3'      |                                                          |
| <i>msh3::MET15</i><br>or<br><i>msh3Δ::LEU2</i> | Msh3KO-<br>upstream   | 5'-GTACTTTTGAGAGCCAAAAGCAGTGCAAATAGATTTATTTGTTGAATCTATT<br>AACAATAAGATTGTACTGAGAGTGCAC-3'   | pRS411 or<br>pRS415<br>(Brachmann<br><i>et al.</i> 1998) |
|                                                | Msh3KO-<br>downstream | 5'-TCAGTGGATATCCAATGATAGTAATTTGCGGAGTTTATCCGTTGCTGTTATAT<br>TATCTGTGCGGTATTTACACCG-3'       |                                                          |
| <i>rev3Δ::TRP1</i>                             | Rev3U                 | 5'-ATTTGAGTCAATACAAAACACTACAAGTTGTGGCGAAATAAAATGTTTGAAAG<br>ATTGTAAGTACTGAGAGTGCAC-3'       | pRS414<br>(Brachmann<br><i>et al.</i> 1998)              |
|                                                | Rev3D                 | 5'-TTACCAATCATTTAGAGATATTAATGCTTCTCCCTTGAACAGATTGATCTGT<br>GCGGTATTTACACCG-3'               |                                                          |
| <i>rad30Δ::TRP1</i>                            | Rad30U                | 5'-TAGCGCAGGCCTGCTCATTTTTGAACGGCTTTGATAAAACAAGACAAAGCAG<br>ATTGTAAGTACTGAGAGTGCAC-3'        | pRS414<br>(Brachmann<br><i>et al.</i> 1998)              |
|                                                | Rad30D                | 5'-TCATTTTTTTCTTGAAAAAATGATAAGATGTTTTGGAAGATGTAACCTCTG<br>TGCGGTATTTACACCG-3'               |                                                          |

<sup>a</sup> pRS411 was used as template for gene replacement with *MET15*; pRS413 with *HIS3*; pRS414 with *TRP1*; pRS415 with *LEU2*.

Mutations were introduced into yeast using PCR products generated with the indicated primers and template DNAs. The PCR conditions for all primers used here were: 98°C, 1 min.; 30x (98°C, 10 sec.; 55°C, 30 sec.; 72°C, 90 sec.); 72°C, 60 sec.
