# Supplementary material
Source: PubMed Central journal article supplement (PMC3583996)
Supplement: 3288873837a7009b31534d9a1416abc6_genetics.112.146910-2.pdf [file 3288873837a7009b31534d9a1416abc6_genetics.112.146910-2.pdf]

**Table S2 Yeast strains**

| Strain              | Relevant Genotype                                             | Reference                 |
|---------------------|---------------------------------------------------------------|---------------------------|
| LW01 <sup>a</sup>   | <i>pol2::kanMX msh2::HIS3</i> + pRS416POL2                    | This study                |
| LW02 <sup>a</sup>   | <i>pol2::kanMX msh3::MET15</i> + pRS416POL2                   | This study                |
| LW03 <sup>a</sup>   | <i>pol2::kanMX msh6::HIS3</i> + pRS416POL2                    | This study                |
| LW04 <sup>a</sup>   | <i>pol2::kanMX mlh1::HIS3</i> + pRS416POL2                    | This study                |
| LW05 <sup>a</sup>   | <i>pol2::kanMX pms1::HIS3</i> + pRS416POL2                    | This study                |
| LW06 <sup>a</sup>   | <i>pol2::kanMX mlh3::MET15</i> + pRS416POL2                   | This study                |
| LW07 <sup>a</sup>   | <i>pol2::kanMX msh6::HIS3 msh3::LEU2</i> + pRS416POL2         | This study                |
| LW08 <sup>a</sup>   | <i>pol2::kanMX pms1::HIS3 mlh3::TRP1</i> + pRS416POL2         | This study                |
| LW09 <sup>a</sup>   | <i>pol2::kanMX msh2::HIS3 rev3::TRP1</i> + pRS416POL2         | This study                |
| LW10 <sup>a</sup>   | <i>pol2::kanMX msh2::HIS3 rad30::TRP1</i> + pRS416POL2        | This study                |
| BP0109 <sup>b</sup> | <i>pol3::HIS3 msh2::TRP1</i> + pGL310 [URA3/POL3]             | (Herr <i>et al.</i> 2011) |
| BP0210 <sup>b</sup> | <i>pol3::HIS3 msh3::TRP1</i> + pGL310 [URA3/POL3]             | This study                |
| BP0301 <sup>b</sup> | <i>pol3::HIS3 msh6::TRP1</i> + pGL310 [URA3/POL3]             | This study                |
| BP0412 <sup>b</sup> | <i>pol3::HIS3 mlh1::TRP1</i> + pGL310 [URA3/POL3]             | This study                |
| BP0502 <sup>b</sup> | <i>pol3::HIS3 pms1::TRP1</i> + pGL310 [URA3/POL3]             | This study                |
| LW09 <sup>b</sup>   | <i>pol3::HIS3 mlh3::TRP1</i> + pGL310 [URA3/POL3]             | This study                |
| LW10 <sup>b</sup>   | <i>pol3::HIS3 msh6::TRP1 msh3::MET15</i> + pGL310 [URA3/POL3] | This study                |
| LW11 <sup>b</sup>   | <i>pol3::HIS3 pms1::TRP1 mlh3::MET15</i> + pGL310 [URA3/POL3] | This study                |
| LW12 <sup>c</sup>   | <i>pol2::NAT1 msh2::MET15</i> + pRS416POL2                    | This study                |
| LW13 <sup>c</sup>   | <i>pol3::NAT1 msh2::MET15</i> + pGL310 [URA3/POL3]            | This study                |

<sup>a</sup> Strains engineered from the BY4733 strain (*MATa leu2Δ0 ura3Δ0 met15Δ0 trp1Δ63 his3Δ200*), an S288C descendent (Brachmann *et al.* 1998) that we re-derived via sporulation of a BY4733 X BY4734 diploid (kindly provided by Tim Formosa, University of Utah). The *pol2::kanMX* strains were constructed from this re-derived BY4733 strain by first introducing pRS416POL2 (to provide a wild-type plasmid copy of *POL2*) and then replacing the entire chromosomal *POL2* gene with a *kanMX* cassette. pRS416POL2 is the *CEN6/ARSH4/URA3* plasmid pRS416 (Brachmann *et al.* 1998) carrying wild-type *POL2* with its natural promoter.

<sup>b</sup> These strains were engineered from P3H3a described in (Herr *et al.* 2011).

<sup>c</sup> These strains were engineered from the Y7092 strain (*MATα can1Δ::STE2pr-his5 lyp1Δ ura3Δ0 leu2Δ0 his3Δ1 met15Δ0*), an S288C descendent modified by the Boone lab to be used as a query strain in Synthetic Genetic Analysis (Tong and Boone 2007).
