# Supplementary material
Source: PubMed Central journal article supplement (PMC3583996)
Supplement: f2fb827f2201a28b46ea678420955b66_genetics.112.146910-1.pdf [file f2fb827f2201a28b46ea678420955b66_genetics.112.146910-1.pdf]

**Table S1 Oligonucleotides used for site-directed mutagenesis**

| Allele             | PCR Primer Name | PCR Primer Sequence                            |
|--------------------|-----------------|------------------------------------------------|
| <i>pol2-4</i>      | pol2-4F1        | 5'-CTGTGGTAATGGCATTGCTATAGCTACCACGAAGCCGCC-3'  |
|                    | pol2-4R1        | 5'-GGCGGCTTCGTGGTAGCTATAGCAAATGCCATTACCACAG-3' |
| <i>pol2-G435C</i>  | eex51qcF        | 5'-ATTCTTATTTACCACAATGTTCCAGGGTTTAAAA-3'       |
|                    | eex51qcR        | 5'-TTTTAAACCCTGGGAACATTGTGGTAAATAAGAAT-3'      |
| <i>pol2-V522A</i>  | eex20qcR        | 5'-GAAATGTTGTTGATGGCTCAAGCTTATCAACAT-3'        |
|                    | eex20qcR        | 5'-ATGTTGATAAGCTTGAGCCATCAACAACATTC-3'         |
| <i>pol2-T850M</i>  | eex26qcF        | 5'-GAAATGGCGGGGATTATGTGTTAACAGGTGCC-3'         |
|                    | eex26qcR        | 5'-GGCACCTGTAAACACATAATCCCCGCCATTC-3'          |
| <i>pol2-K966Q</i>  | eex55qcF        | 5'-GAAGGAAAAGGTATACAGAAAAGATATGCTGTC-3'        |
|                    | eex55qcR        | 5'-GACAGCATATCTTTCTGTATACCTTTTCCTTC-3'         |
| <i>pol2-A1153D</i> | eex12qcF        | 5'-GAAAGACTTGGATCTGATATACAAAAGATAATT-3'        |
|                    | eex12qcR        | 5'-AATTATCTTTGTATATCAGATCCAAGTCTTC-3'          |

Mutations were introduced into pRS415POL2 or pRS415pol2-4 using the QuickChange protocol (Wang and Malcolm 1999), Phusion Polymerase (New England Biolabs), the indicated primers, and PCR conditions of 95°C, 1 min; 16x (95°C, 40 sec.; 53°C, 60 sec., 68°C, 7 min.).

**Table S2 Yeast strains**

| Strain              | Relevant Genotype                                             | Reference                 |
|---------------------|---------------------------------------------------------------|---------------------------|
| LW01 <sup>a</sup>   | <i>pol2::kanMX msh2::HIS3</i> + pRS416POL2                    | This study                |
| LW02 <sup>a</sup>   | <i>pol2::kanMX msh3::MET15</i> + pRS416POL2                   | This study                |
| LW03 <sup>a</sup>   | <i>pol2::kanMX msh6::HIS3</i> + pRS416POL2                    | This study                |
| LW04 <sup>a</sup>   | <i>pol2::kanMX mlh1::HIS3</i> + pRS416POL2                    | This study                |
| LW05 <sup>a</sup>   | <i>pol2::kanMX pms1::HIS3</i> + pRS416POL2                    | This study                |
| LW06 <sup>a</sup>   | <i>pol2::kanMX mlh3::MET15</i> + pRS416POL2                   | This study                |
| LW07 <sup>a</sup>   | <i>pol2::kanMX msh6::HIS3 msh3::LEU2</i> + pRS416POL2         | This study                |
| LW08 <sup>a</sup>   | <i>pol2::kanMX pms1::HIS3 mlh3::TRP1</i> + pRS416POL2         | This study                |
| LW09 <sup>a</sup>   | <i>pol2::kanMX msh2::HIS3 rev3::TRP1</i> + pRS416POL2         | This study                |
| LW10 <sup>a</sup>   | <i>pol2::kanMX msh2::HIS3 rad30::TRP1</i> + pRS416POL2        | This study                |
| BP0109 <sup>b</sup> | <i>pol3::HIS3 msh2::TRP1</i> + pGL310 [URA3/POL3]             | (Herr <i>et al.</i> 2011) |
| BP0210 <sup>b</sup> | <i>pol3::HIS3 msh3::TRP1</i> + pGL310 [URA3/POL3]             | This study                |
| BP0301 <sup>b</sup> | <i>pol3::HIS3 msh6::TRP1</i> + pGL310 [URA3/POL3]             | This study                |
| BP0412 <sup>b</sup> | <i>pol3::HIS3 mlh1::TRP1</i> + pGL310 [URA3/POL3]             | This study                |
| BP0502 <sup>b</sup> | <i>pol3::HIS3 pms1::TRP1</i> + pGL310 [URA3/POL3]             | This study                |
| LW09 <sup>b</sup>   | <i>pol3::HIS3 mlh3::TRP1</i> + pGL310 [URA3/POL3]             | This study                |
| LW10 <sup>b</sup>   | <i>pol3::HIS3 msh6::TRP1 msh3::MET15</i> + pGL310 [URA3/POL3] | This study                |
| LW11 <sup>b</sup>   | <i>pol3::HIS3 pms1::TRP1 mlh3::MET15</i> + pGL310 [URA3/POL3] | This study                |
| LW12 <sup>c</sup>   | <i>pol2::NAT1 msh2::MET15</i> + pRS416POL2                    | This study                |
| LW13 <sup>c</sup>   | <i>pol3::NAT1 msh2::MET15</i> + pGL310 [URA3/POL3]            | This study                |

<sup>a</sup> Strains engineered from the BY4733 strain (*MATa leu2Δ0 ura3Δ0 met15Δ0 trp1Δ63 his3Δ200*), an S288C descendent (Brachmann *et al.* 1998) that we re-derived via sporulation of a BY4733 X BY4734 diploid (kindly provided by Tim Formosa, University of Utah). The *pol2::kanMX* strains were constructed from this re-derived BY4733 strain by first introducing pRS416POL2 (to provide a wild-type plasmid copy of *POL2*) and then replacing the entire chromosomal *POL2* gene with a *kanMX* cassette. pRS416POL2 is the *CEN6/ARSH4/URA3* plasmid pRS416 (Brachmann *et al.* 1998) carrying wild-type *POL2* with its natural promoter.

<sup>b</sup> These strains were engineered from P3H3a described in (Herr *et al.* 2011).

<sup>c</sup> These strains were engineered from the Y7092 strain (*MATα can1Δ::STE2pr-his5 lyp1Δ ura3Δ0 leu2Δ0 his3Δ1 met15Δ0*), an S288C descendent modified by the Boone lab to be used as a query strain in Synthetic Genetic Analysis (Tong and Boone 2007).

**Table S3 Construction of chromosomal gene disruptions**

| Allele                                    | PCR Primer Name | PCR Primer Sequence                                                                                | PCR Template <sup>a</sup>                       |
|-------------------------------------------|-----------------|----------------------------------------------------------------------------------------------------|-------------------------------------------------|
| <i>pol2Δ::kanMX</i>                       | Pol2-kanMXkoF   | 5'-ATGATGTTTGGCAAGAAAAAACAACGGAGGATCTTCCACTGCAAGATATTCAGCTGGCGAAGTTATTAGGTCTAGAGATCTG-3'           | pUG6 (Guldener <i>et al.</i> 1996)              |
|                                           | Pol2-kanMXkoR   | 5'-TCATATGGTCAAATCAGCAATACAACCTCAATAATATATCAAACCGTAATACTTGGCTACTACGAAGTTATATTAAGGGTTCTCG-3'        |                                                 |
| <i>pol2Δ::natMX</i>                       | Pol2::nat1-for2 | 5'-AGAGCATATGATGATGAAAGAGCACATTCTATCAAGATAAACACTCTCAGGGGACAAGTATACATGGAGGCCAGAATACCCT-3'           | pFvL99 (Stulemeijer <i>et al.</i> 2011)         |
|                                           | Pol2::nat1-rev2 | 5'-TTTTTTTTTTTTTTTTTTCATGGTAAAGAGGCCATTGAACCTCGCGTTATATAC TGCTTACCAGTATAGCGACCAGCATTAC-3'          |                                                 |
| <i>pol3Δ::natMX</i>                       | Pol3MXF         | 5'-ATAGATATTGAGCACTTGCTATTAAGCATTAACTTTATACATATACGCACAGCAACATGGAGGCCAGAATACCCT-3'                  | pFvL99 (Stulemeijer <i>et al.</i> 2011)         |
|                                           | Pol3MXR         | 5'-GCAAAAAGTTGTTAGCCTTTCTTAATCCTAATATGATGTGCCACCCTATCGTTTTCAGTATAGCGACCAGCATTAC-3'                 |                                                 |
| <i>msh2Δ::HIS3</i> or <i>msh2Δ::TRP1</i>  | Msh2U           | 5'-AAAAATCTCTTTATCTGCTGACCTAACATCAAATCCTCAGATTAAGTAGA TTGTACTGAGAGTGCAC-3'                         | pRS413 or pRS414 (Brachmann <i>et al.</i> 1998) |
|                                           | Msh2D           | 5'-TTATAACAACAAGGCTTTTATATATTTTCAGGTAATTATCGTTTTCTTTCTGT GCGGTATTTACACCG-3'                        |                                                 |
| <i>msh2Δ::MET15</i>                       | Msh2::Met15F    | 5'-AAAAATCTCTTTATCTGCTGACCTAACATCAAATCCTGCTGGCTTAACTATG CGGCATC-3'                                 | pRS411 (Brachmann <i>et al.</i> 1998)           |
|                                           | Msh2::Met15R    | 5'-TTATAACAACAAGGCTTTTATATATTTTCAGGTAATTATGTTTACAATTTCTGA TGCGGT-3'                                |                                                 |
| <i>msh6Δ::HIS3</i> or <i>msh6Δ::TRP1</i>  | Msh6U           | 5'-TTAATTGGAGCAACTAGTTAATTTTGACAAAGCCAATTTGAACTCCAAGA AGTTATTAGGTCTAGAGATCTG-3'                    | pRS413 or pRS414 (Brachmann <i>et al.</i> 1998) |
|                                           | Msh6D           | 5'-ACTTTAAAAAATAAGTAAAAATCTTACATACATCGTAAATGAAAATACAC GAAGTTATATTAAGGGTTCTCG-3'                    |                                                 |
| <i>mlh1 Δ::HIS3</i> or <i>mlh1Δ::TRP1</i> | Mlh1U           | 5'-ATAGTGATAGTAAATGGAAGGTAATAAACATAGACCTATCAATAAGCAA TGCTCTCAGAATAAAAGCAGATTGTAAGTACTGAGAGTGCAC-3' | pRS413 or pRS414 (Brachmann <i>et al.</i> 1998) |
|                                           | Mlh1D           | 5'-CTCAGGAAATAAACAAAAAATTTGGTATTACAGCCAAAACGTTTTAAAGTT AACACCTCTCAAAAATTTACTGTGCGGT ATTTACACCG-3'  |                                                 |
| <i>pms1Δ::HIS3</i> or <i>pms1Δ::TRP1</i>  | Pms1U           | 5'-GAACGCGAAAAGAAAAGACGCTCTCTTAATAATCATTATGCGATAAAAT GTTTCACCACATCGAAAAAGATTGTAAGTACTGAGAGTGCAC-3' | pRS413 or pRS414 (Brachmann <i>et al.</i> 1998) |
|                                           | Pms1D           | 5'-TGTATATAATGATTTGTTAATTATATAATGAATGAATATCAAAGCTAGATCA TATTCGTAATCCTTCGACTGTGCGGTATTTACACCG-3'    |                                                 |

|                                                |                       |                                                                                             |                                                          |
|------------------------------------------------|-----------------------|---------------------------------------------------------------------------------------------|----------------------------------------------------------|
| <i>mlh3::MET15</i><br>or<br><i>mlh3Δ::TRP1</i> | Mlh3KO-<br>upstream   | 5'-ACATAAACCCAGCGAGGCTTTCAAGGAAGAATGAACGTGAACTCGTCAACTC<br>AAAAAGAAAAGATTGTACTGAGAGTGCAC-3' | pRS411 or<br>pRS414<br>(Brachmann<br><i>et al.</i> 1998) |
|                                                | Mlh3KO-<br>downstream | 5'-TGCATATCCGCGCAATTTAAAATGCAGGCGACAAACCTTGTTCCAGGATTAA<br>GGTTCTCTGTGCGGTATTTACACCG-3'     |                                                          |
| <i>msh3::MET15</i><br>or<br><i>msh3Δ::LEU2</i> | Msh3KO-<br>upstream   | 5'-GTACTTTTGAGAGCCAAAAGCAGTGCAAATAGATTTATTTTGTGAATCTATT<br>AACAATAAGATTGTACTGAGAGTGCAC-3'   | pRS411 or<br>pRS415<br>(Brachmann<br><i>et al.</i> 1998) |
|                                                | Msh3KO-<br>downstream | 5'-TCAGTGGATATCCAATGATAGTAATTTGCGGAGTTTATCCGTTGCTGTTATAT<br>TATCTGTGCGGTATTTACACCG-3'       |                                                          |
| <i>rev3Δ::TRP1</i>                             | Rev3U                 | 5'-ATTTGAGTCAATACAAAACACTACAAGTTGTGGCGAAATAAAATGTTTGAAAG<br>ATTGTAAGTACTGAGAGTGCAC-3'       | pRS414<br>(Brachmann<br><i>et al.</i> 1998)              |
|                                                | Rev3D                 | 5'-TTACCAATCATTTAGAGATATTAATGCTTCTTCCCTTGAACAGATTGATCTGT<br>GCGGTATTTACACCG-3'              |                                                          |
| <i>rad30Δ::TRP1</i>                            | Rad30U                | 5'-TAGCGCAGGCCTGCTCATTTTTGAACGGCTTTGATAAAACAAGACAAAGCAG<br>ATTGTAAGTACTGAGAGTGCAC-3'        | pRS414<br>(Brachmann<br><i>et al.</i> 1998)              |
|                                                | Rad30D                | 5'-TCATTTTTTTCTTGAAAAAATGATAAGATGTTTTGGAAGATGTAACCTTCTG<br>TGCGGTATTTACACCG-3'              |                                                          |

<sup>a</sup> pRS411 was used as template for gene replacement with *MET15*; pRS413 with *HIS3*; pRS414 with *TRP1*; pRS415 with *LEU2*.

Mutations were introduced into yeast using PCR products generated with the indicated primers and template DNAs. The PCR conditions for all primers used here were: 98°C, 1 min.; 30x (98°C, 10 sec.; 55°C, 30 sec.; 72°C, 90 sec.); 72°C, 60 sec.

## REFERENCES

- Brachmann, C. B., A. Davies, G. J. Cost, E. Caputo, J. Li *et al.*, 1998 Designer deletion strains derived from *Saccharomyces cerevisiae* S288C: a useful set of strains and plasmids for PCR-mediated gene disruption and other applications. *Yeast* 14: 115-132.
- Guldener, U., S. Heck, T. Fielder, J. Beinhauer and J. H. Hegemann, 1996 A new efficient gene disruption cassette for repeated use in budding yeast. *Nucleic Acids Res.* 24: 2519-2524.
- Herr, A. J., M. Ogawa, N. A. Lawrence, L. N. Williams, J. M. Eggington *et al.*, 2011 Mutator suppression and escape from replication error–induced extinction in yeast. *PLoS Genet.* 7: e1002282.
- Stulemeijer, I. J., B. L. Pike, A. W. Faber, K. F. Verzijlbergen, T. van Welsem *et al.*, 2011 Dot1 binding induces chromatin rearrangements by histone methylation-dependent and -independent mechanisms. *Epigenetics Chromatin.* 4: 2-15.
- Tong, A. H. Y., and C. Boone, 2007 High-throughput strain construction and systematic synthetic lethal screening in *Saccaromyces cerevisiae*, pp. 369-386, 706-707 in *Methods in Microbiology*, edited by I. Stansfield and M. J. R. Stark. Academic Press.
- Wang, W., and B. A. Malcolm, 1999 Two-stage PCR protocol allowing introduction of multiple mutations, deletions and insertions using QuikChange Site-Directed Mutagenesis. *Biotechniques* 26: 680-682.
